# Supplementary material
Source: PubMed Central journal article supplement (PMC5555595)
Supplement: NIHMS880012-supplement-Supp_Info.pdf [file NIHMS880012-supplement-Supp_Info.pdf]

## SUPPLEMENTARY MATERIAL

### [NiFe]-Hydrogenase synthetic models with redox-active ligands

David Schilter,<sup>A,B,C</sup> Danielle L. Gray,<sup>B</sup> Amy L. Fuller,<sup>B</sup> and Thomas B. Rauchfuss<sup>B</sup>

<sup>A</sup>IBS Center for Multidimensional Carbon Materials, 50 UNIST-gil, Ulsan 44919 (South Korea)

<sup>B</sup>Department of Chemistry, University of Illinois at Urbana-Champaign, 600 S. Goodwin Ave. Urbana, IL 61801, USA

<sup>C</sup>Corresponding author. Email: d.schilter@gmail.com

#### List of Figures

|                                                                                                                                                                   |    |
|-------------------------------------------------------------------------------------------------------------------------------------------------------------------|----|
| Figure S1. FT-IR spectrum ( $\nu_{CO}$ region, CH <sub>2</sub> Cl <sub>2</sub> ) of [1a( $\mu$ -H)]BF <sub>4</sub> .....                                          | 2  |
| Figure S2. <sup>31</sup> P{ <sup>1</sup> H} NMR spectra (CD <sub>2</sub> Cl <sub>2</sub> , 202 MHz) of [1a( $\mu$ -H)]BF <sub>4</sub> .....                       | 2  |
| Figure S3. <sup>1</sup> H NMR spectrum (CD <sub>2</sub> Cl <sub>2</sub> , 500 MHz) of [1a( $\mu$ -H)]BF <sub>4</sub> .....                                        | 3  |
| Figure S4. Positive ion ESI mass spectrum of [1a( $\mu$ -H)]BF <sub>4</sub> .....                                                                                 | 3  |
| Figure S5. X-ray structure of [1a( $\mu$ -H)]BF <sub>4</sub> ·CH <sub>2</sub> Cl <sub>2</sub> .....                                                               | 4  |
| Figure S6. Cyclic voltammograms of [1a( $\mu$ -H)]BF <sub>4</sub> acquired in the presence of varying molar equivalents of CF <sub>3</sub> CO <sub>2</sub> H..... | 5  |
| Figure S7. Analysis of the currents observed for reduction of [1a( $\mu$ -H)]BF <sub>4</sub> in the presence of CF <sub>3</sub> CO <sub>2</sub> H.....            | 5  |
| Figure S8. FT-IR spectrum ( $\nu_{CO}$ region, CH <sub>2</sub> Cl <sub>2</sub> ) of [1a]BF <sub>4</sub> .....                                                     | 6  |
| Figure S9. Positive ion ESI mass spectrum of [1a]BF <sub>4</sub> .....                                                                                            | 6  |
| Figure S10. Cyclic voltammogram of [1a]BF <sub>4</sub> .....                                                                                                      | 7  |
| Figure S11: FT-IR spectrum ( $\nu_{CO}$ region, CH <sub>2</sub> Cl <sub>2</sub> ) of [1b]BF <sub>4</sub> .....                                                    | 7  |
| Figure S12: Positive ion ESI mass spectrum of [1b]BF <sub>4</sub> .....                                                                                           | 8  |
| Figure S13: FT-IR spectrum ( $\nu_{CO}$ region, CH <sub>2</sub> Cl <sub>2</sub> ) of [1c]BF <sub>4</sub> .....                                                    | 8  |
| Figure S14. Positive ion ESI mass spectrum of [1c]BF <sub>4</sub> .....                                                                                           | 9  |
| Figure S15. X-band EPR spectra of [1c]BF <sub>4</sub> in CH <sub>2</sub> Cl <sub>2</sub> /PhMe.....                                                               | 9  |
| Figure S16. Cyclic voltammogram of [1c]BF <sub>4</sub> .....                                                                                                      | 9  |
| Figure S17. FT-IR spectrum ( $\nu_{CO}$ region, CH <sub>2</sub> Cl <sub>2</sub> ) of [1c](BF <sub>4</sub> ) <sub>2</sub> .....                                    | 10 |
| Figure S18. <sup>31</sup> P{ <sup>1</sup> H} NMR spectrum (CD <sub>2</sub> Cl <sub>2</sub> , 202 MHz) of [1c](BF <sub>4</sub> ) <sub>2</sub> .....                | 10 |
| Figure S19. <sup>1</sup> H NMR spectrum (CD <sub>2</sub> Cl <sub>2</sub> , 500 MHz) of [1c](BF <sub>4</sub> ) <sub>2</sub> .....                                  | 11 |
| Figure S20: Positive ion ESI mass spectra of [1c](BF <sub>4</sub> ) <sub>2</sub> .....                                                                            | 12 |
| Figure S21. FT-IR spectrum ( $\nu_{CO}$ region, CH <sub>2</sub> Cl <sub>2</sub> ) of [2a]BF <sub>4</sub> .....                                                    | 13 |
| Figure S22. Positive ion ESI mass spectrum of [2a]BF <sub>4</sub> .....                                                                                           | 13 |
| Figure S23. Cyclic voltammogram of [2a]BF <sub>4</sub> .....                                                                                                      | 13 |
| Figure S24. FT-IR spectrum ( $\nu_{CO}$ region, CH <sub>2</sub> Cl <sub>2</sub> ) of [2b]BF <sub>4</sub> .....                                                    | 14 |
| Figure S25. Positive ion ESI mass spectrum of [2b]BF <sub>4</sub> .....                                                                                           | 14 |
| Figure S26. Cyclic voltammogram of [2b]BF <sub>4</sub> .....                                                                                                      | 15 |
| Figure S27: FT-IR spectrum ( $\nu_{CO}$ region, CH <sub>2</sub> Cl <sub>2</sub> ) of [2c]BF <sub>4</sub> .....                                                    | 15 |

|                                                                                                                               |    |
|-------------------------------------------------------------------------------------------------------------------------------|----|
| Figure S28. Positive ion ESI mass spectrum of [2c]BF <sub>4</sub> .....                                                       | 16 |
| Figure S29. X-band EPR spectra of [2c]BF <sub>4</sub> in CH <sub>2</sub> Cl <sub>2</sub> /PhMe .....                          | 16 |
| Figure S30. Cyclic voltammogram of [2c]BF <sub>4</sub> .....                                                                  | 16 |
| Figure S31: FT-IR spectrum ( $\nu_{CO}$ region, CH <sub>2</sub> Cl <sub>2</sub> ) of [3](BF <sub>4</sub> ) <sub>2</sub> ..... | 17 |
| Figure S32. Positive ion ESI mass spectrum of [3](BF <sub>4</sub> ) <sub>2</sub> .....                                        | 17 |
| Figure S33. X-band EPR spectra of [3](BF <sub>4</sub> ) <sub>2</sub> in CH <sub>2</sub> Cl <sub>2</sub> /PhMe .....           | 18 |
| Figure S34. Cyclic voltammogram of [3](BF <sub>4</sub> ) <sub>2</sub> .....                                                   | 18 |

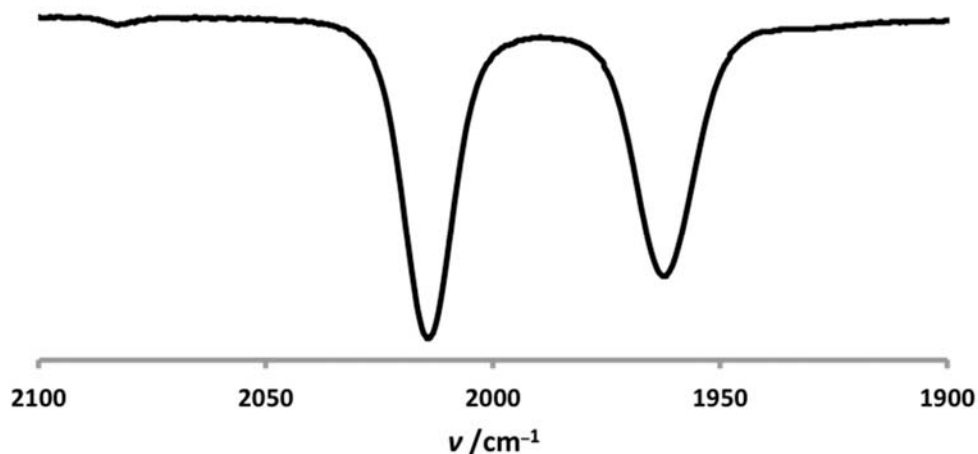

**Figure S1.** FT-IR spectrum ( $\nu_{CO}$  region, CH<sub>2</sub>Cl<sub>2</sub>) of [1a( $\mu$ -H)]BF<sub>4</sub>.

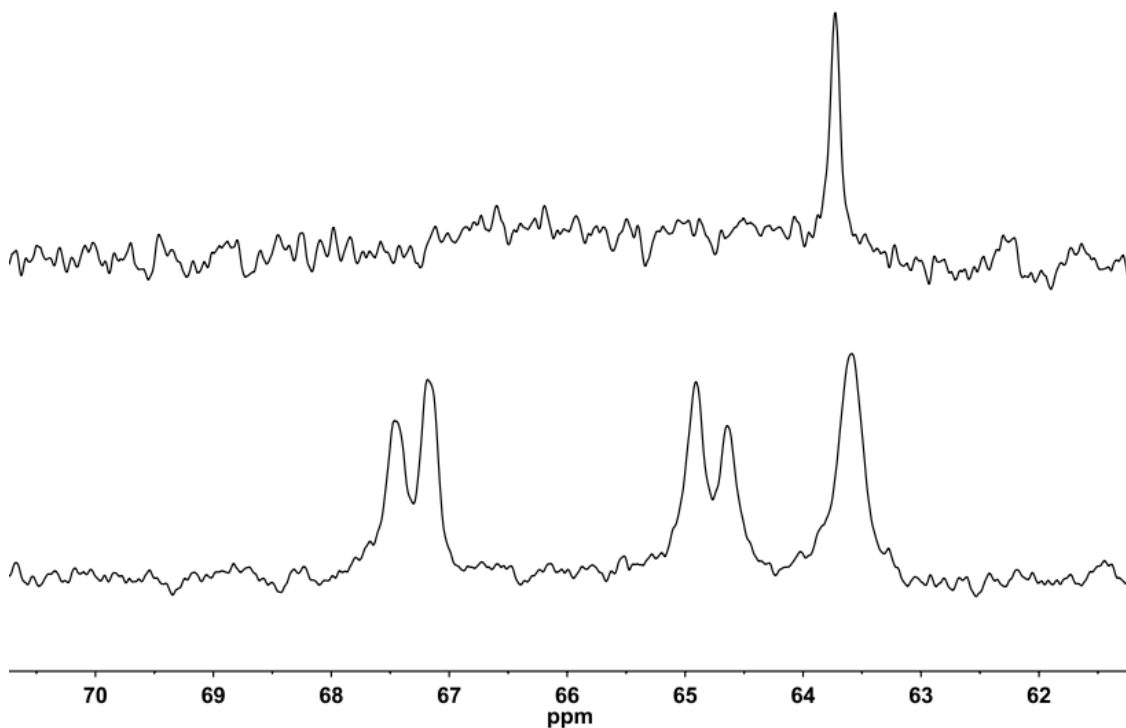

**Figure S2.** <sup>31</sup>P{<sup>1</sup>H} NMR spectra (CD<sub>2</sub>Cl<sub>2</sub>, 202 MHz) of [1a( $\mu$ -H)]BF<sub>4</sub> recorded at room temperature (top) and at -28°C (bottom).

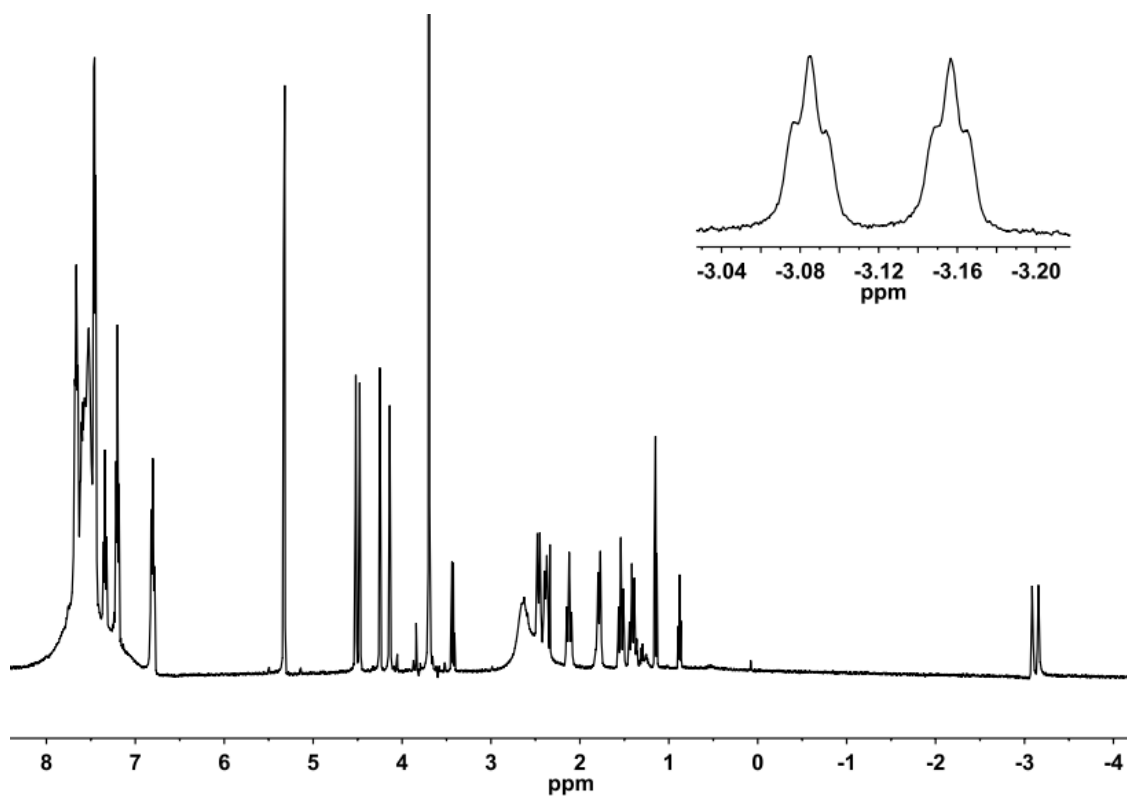

**Figure S3.**  $^1\text{H}$  NMR spectrum ( $\text{CD}_2\text{Cl}_2$ , 500 MHz) of  $[\mathbf{1a}(\mu\text{-H})]\text{BF}_4$ . Resonances at 3.43 ( $\text{Et}_2\text{O}$ ), 1.31 (pentane), 1.12 ( $\text{Et}_2\text{O}$ ) and 0.89 ppm (pentane) are from impurities in the NMR solvent.

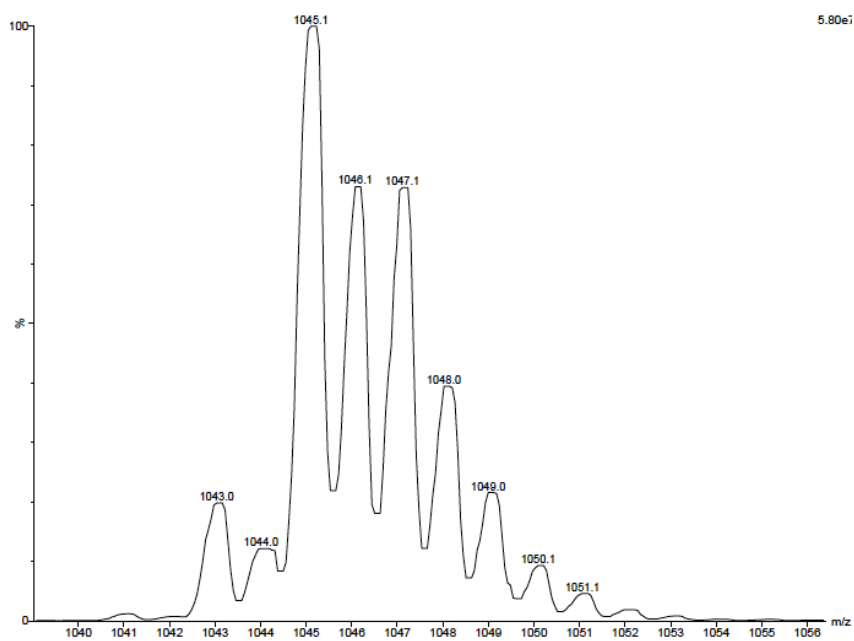

**Figure S4.** Positive ion ESI mass spectrum of  $[\mathbf{1a}(\mu\text{-H})]\text{BF}_4$ .

Brown single crystals of  $[\mathbf{1a}(\mu\text{-H})]\text{BF}_4 \cdot \text{CH}_2\text{Cl}_2$  formed upon slow diffusion of pentane vapor into a concentrated  $\text{CH}_2\text{Cl}_2$  solution of  $[\mathbf{1a}(\mu\text{-H})]\text{BF}_4$ . One crystal was subjected to X-ray diffraction at 173 K, its space group determined as monoclinic  $P2_1/c$  ( $Z = 4$ ) with cell parameters:  $a$  12.6528(6) Å,  $b$  33.7738(18) Å,  $c$  12.2942(6) Å,  $\alpha$  90°,  $\beta$  90.373(4)°,  $\gamma$  90°. While these preliminary data were of poor quality, they did confirm the atom connectivity within the complex. The Ni-Fe distance in  $[\mathbf{1a}(\mu\text{-H})]^+$  (2.662 Å) is similar to that in the analogous triphosphine hydride  $[(\text{dppe})\text{Ni}(\text{pdt})\text{HFe}(\text{CO})_2(\text{PPh}_3)]^+$  (2.643 Å), with the monophosphine occupying a basal coordination site *trans* to an S atom in both complexes. The  $\text{H}^-$  ligand was not resolved in the Fourier difference map. Rather, it was fixed at a distance from Fe1 equivalent to that in the  $\text{PPh}_3$  congener. Indirect evidence of the presence of  $\text{H}^-$  comes from the stereochemistry at the Fe1 site: were the hydride not present, then the mppf ligand would likely occupy an apical position, as it does in the Ni(II)Fe(I) model complexes of the type  $[(\text{dppe})\text{Ni}(\text{pdt})\text{Fe}(\text{CO})_2(\text{PRAr}_2)]^+$ , including  $[\mathbf{2b}]^+$ . In this case, the  $\pi$ -accepting CO ligands are poised *trans* to the  $\pi$ -donating CO groups, no doubt a favorable situation. But this is not the case with  $[\mathbf{1a}(\mu\text{-H})]^+$ , in which mppf occupied a basal site, ceding its favorable apical position to CO, a ligand that prefers a strong donor *trans* to it, in this case  $\text{H}^-$ . Lastly, it is noted that the bond distances are consistent with a Ni(II)( $\mu\text{-H}$ )Fe(II)Fe(II) description for this complex, in line with the CO stretching frequencies and the sharpness of the NMR data.

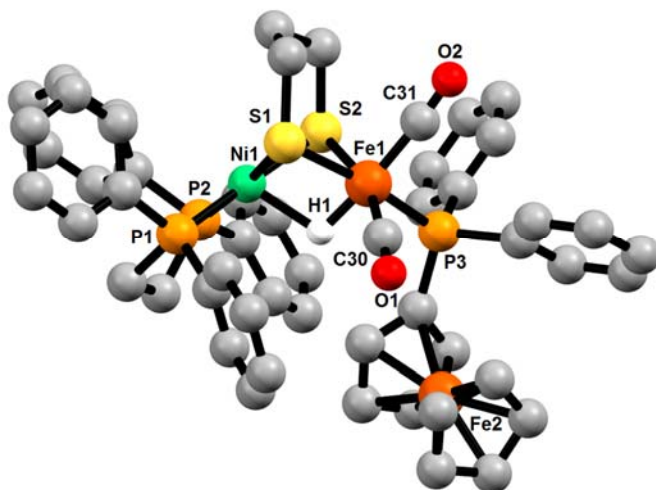

**Figure S5.** X-ray structure of  $[\mathbf{1a}(\mu\text{-H})]\text{BF}_4 \cdot \text{CH}_2\text{Cl}_2$  with the H atoms, disordered  $\text{BF}_4^-$  anion and  $\text{CH}_2\text{Cl}_2$  solvate molecule omitted for clarity. Disorder in the Cp ring and two Ph groups of the dppe ligand is also omitted for clarity. Selected distances (Å): Ni1-Fe1, 2.66; Ni1-P1, 2.17; Ni1-P2, 2.17; Ni1-S1, 2.21; Ni1-S2, 2.21; Fe1-S1, 2.31; Fe1-S2, 2.31; Fe1-H1, 1.49; Fe1-C30, 1.79; Fe1-C31, 1.78; Fe1-P3, 2.23; Fe2-C<sub>5</sub>H<sub>5</sub>(centroid), 1.64; Fe2-C<sub>5</sub>H<sub>4</sub>PPh<sub>2</sub>(centroid), 1.72.

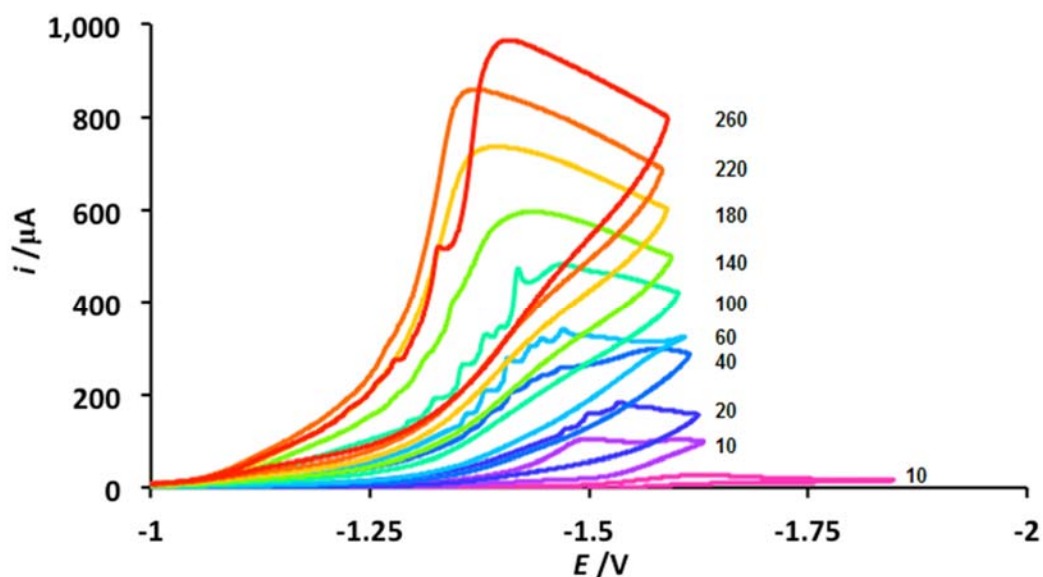

**Figure S6.** Cyclic voltammograms of  $[1\mathbf{a}(\mu\text{-H})]\text{BF}_4$  (1 mM) acquired in the presence of varying molar equivalents of  $\text{CF}_3\text{CO}_2\text{H}$ .

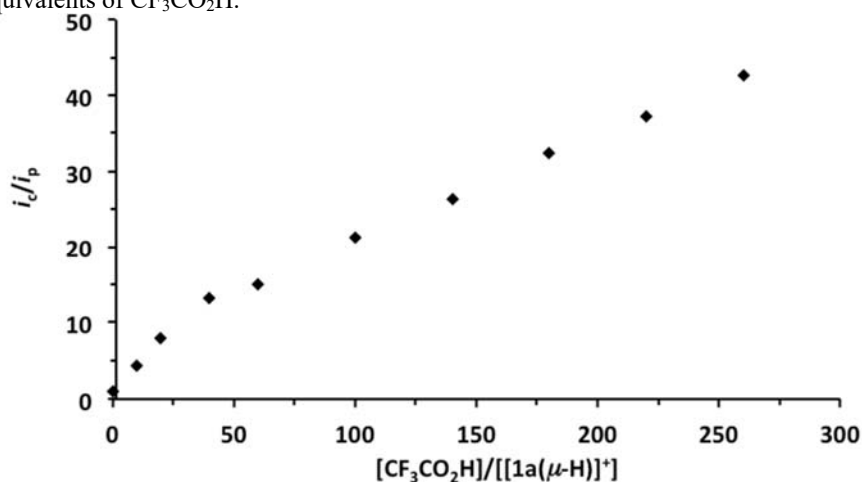

**Figure S7.** Analysis of the currents observed for reduction of  $[1\mathbf{a}(\mu\text{-H})]\text{BF}_4$  (1 mM). The quotient of the current in the presence ( $i_c$ ) to that in the absence of the acid  $\text{CF}_3\text{CO}_2\text{H}$  ( $i_p$ ) is plotted against the molar ratio of  $\text{CF}_3\text{CO}_2\text{H}$  to  $[1\mathbf{a}(\mu\text{-H})]^+$ . At higher acid concentrations, the wave shifts to more negative potentials, in line with direct reduction of  $\text{CF}_3\text{CO}_2\text{H}$  at the glassy carbon electrode.

The turnover frequency  $k$  for catalytic hydrogen evolution ( $n = 2$ ) at a given scan rate  $\nu$  and temperature  $T$  can be determined using peak currents in the presence ( $i_c$ ) and absence of acid ( $i_p$ ). For catalysis at  $E_{\text{pc}} = -1.37$  V (potential at  $i_c/2 = E_{\text{pc}} = -1.33$  V):

$$\frac{i_c}{i_p} = \frac{n}{0.4463} \sqrt{\frac{RTk}{F\nu}}$$

$$\frac{965 \mu\text{A}}{22.6 \mu\text{A}} = \frac{2}{0.4463} \sqrt{\frac{(8.314 \text{ J K}^{-1} \text{ mol}^{-1})(298 \text{ K})k}{(96485 \text{ C mol}^{-1})(0.1 \text{ J C}^{-1} \text{ s}^{-1})}}$$

$$k \approx 350 \text{ s}^{-1}$$

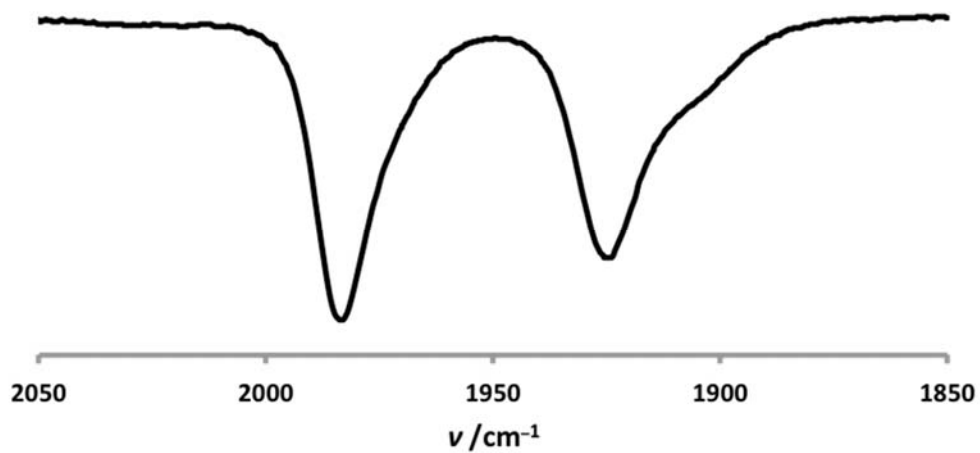

**Figure S8.** FT-IR spectrum ( $\nu_{\text{CO}}$  region,  $\text{CH}_2\text{Cl}_2$ ) of **[1a]** $\text{BF}_4$ .

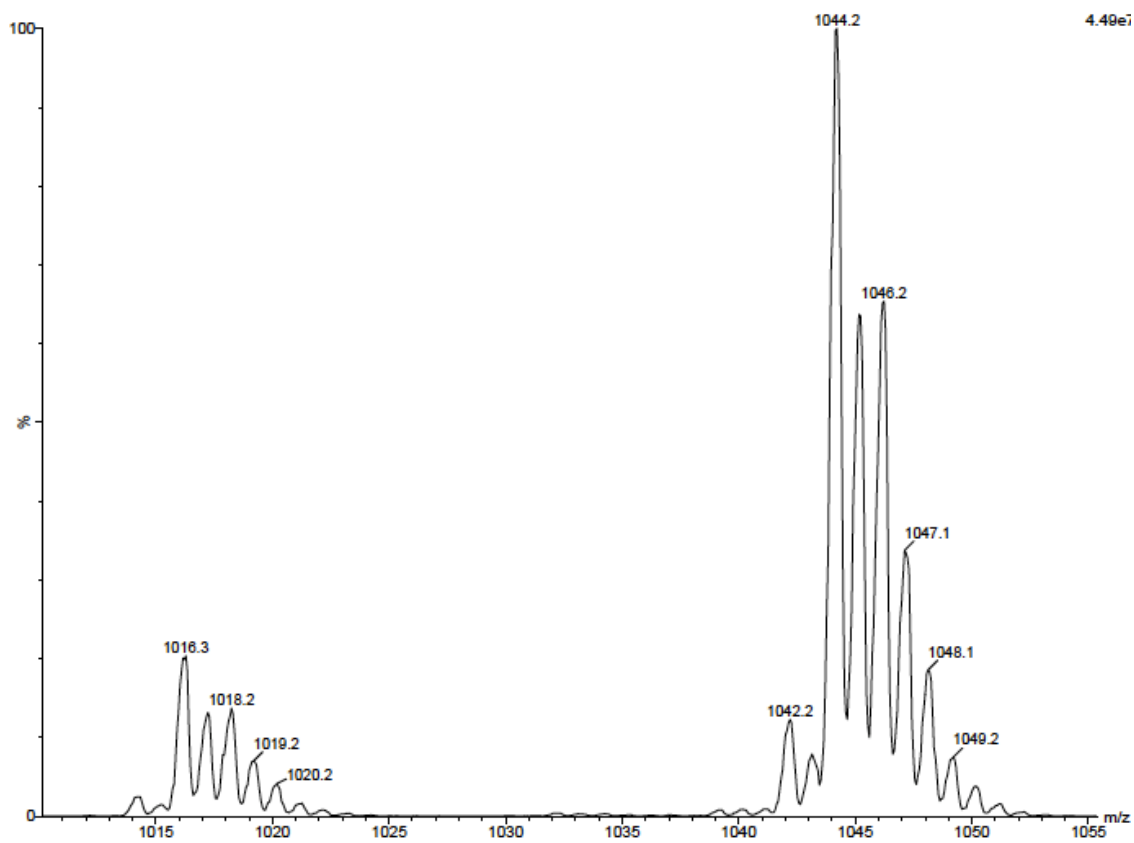

**Figure S9.** Positive ion ESI mass spectrum of **[1a]** $\text{BF}_4$ .

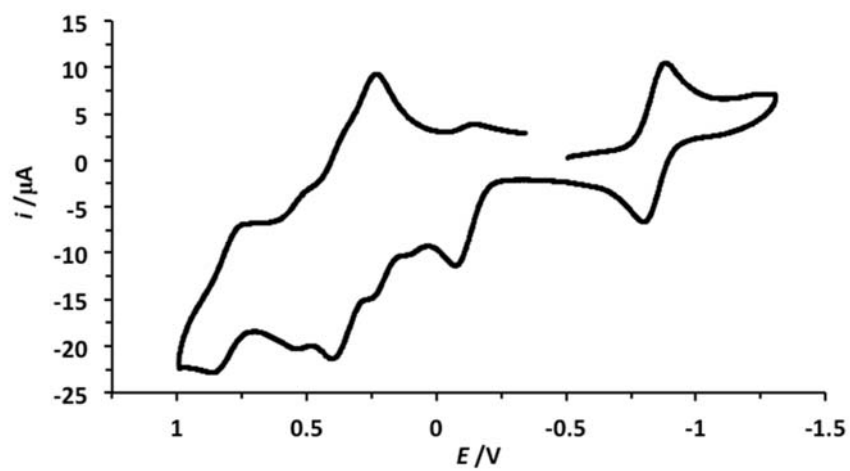

**Figure S10.** Cyclic voltammogram of [1a]BF<sub>4</sub>.

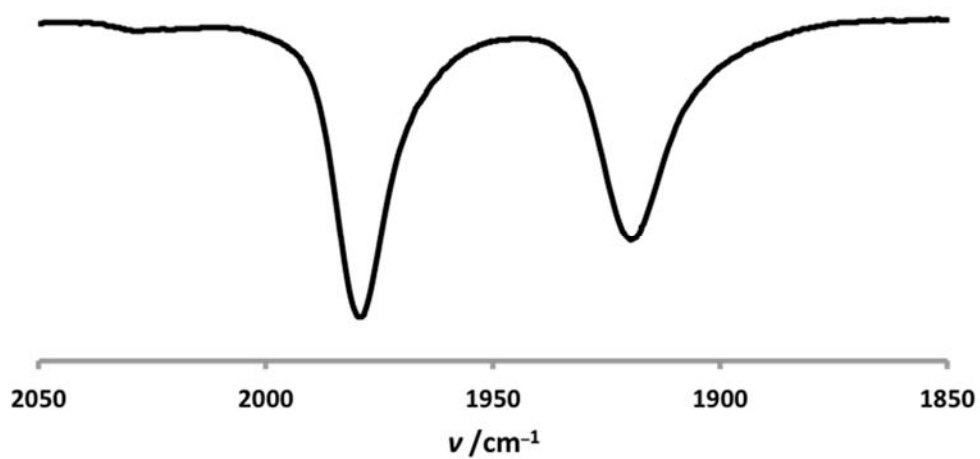

**Figure S11:** FT-IR spectrum ( $\nu_{\text{CO}}$  region, CH<sub>2</sub>Cl<sub>2</sub>) of [1b]BF<sub>4</sub>.

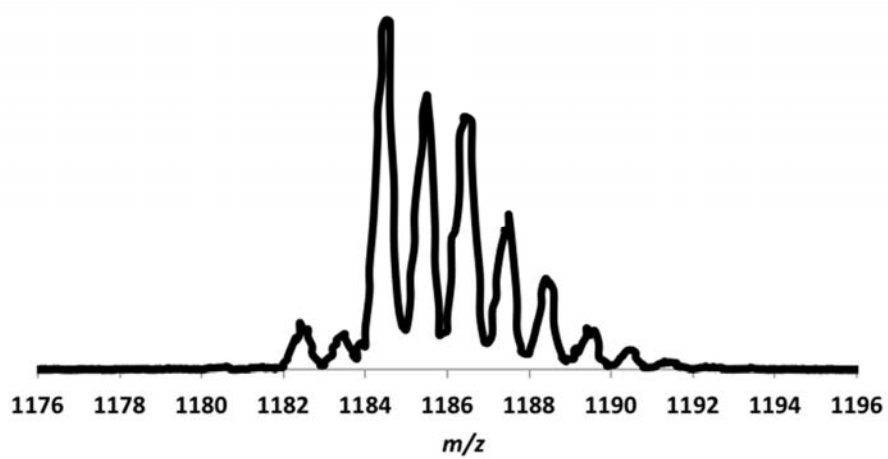

**Figure S12:** Positive ion ESI mass spectrum of [1b]BF<sub>4</sub>.

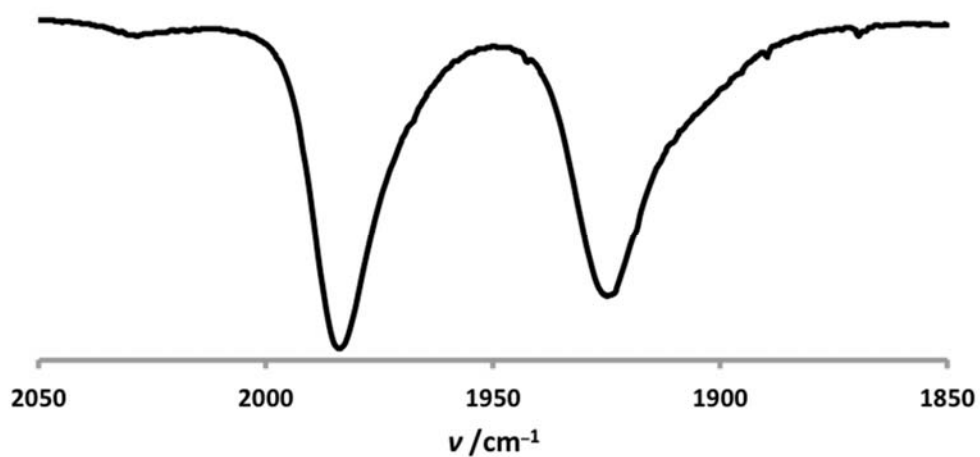

**Figure S13:** FT-IR spectrum ( $\nu_{\text{CO}}$  region, CH<sub>2</sub>Cl<sub>2</sub>) of [1c]BF<sub>4</sub>.



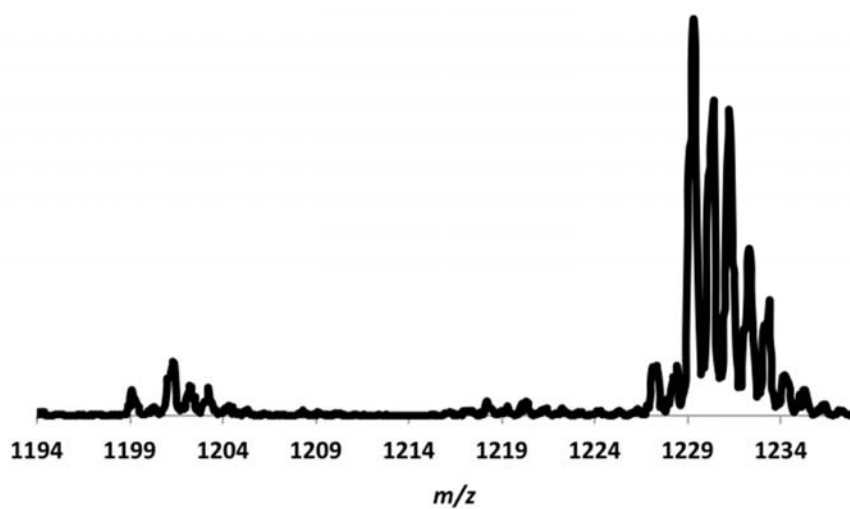

**Figure S14.** Positive ion ESI mass spectrum of [1c]BF<sub>4</sub>.

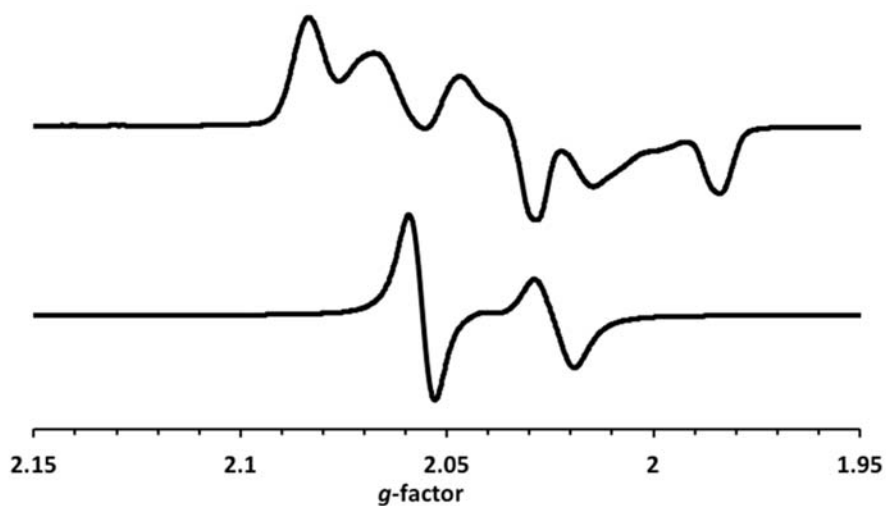

**Figure S15.** X-band EPR spectra of [1c]BF<sub>4</sub> in CH<sub>2</sub>Cl<sub>2</sub>/PhMe recorded at 110 K (top) and room temperature (bottom).

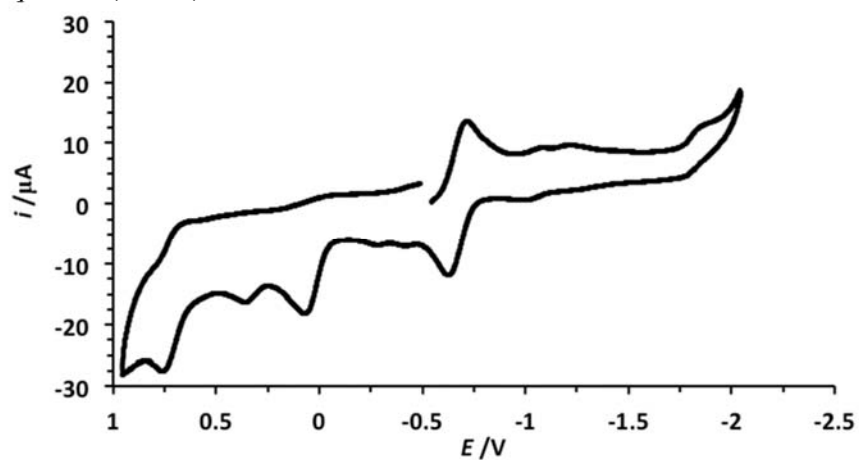

**Figure S16.** Cyclic voltammogram of [1c]BF<sub>4</sub>.

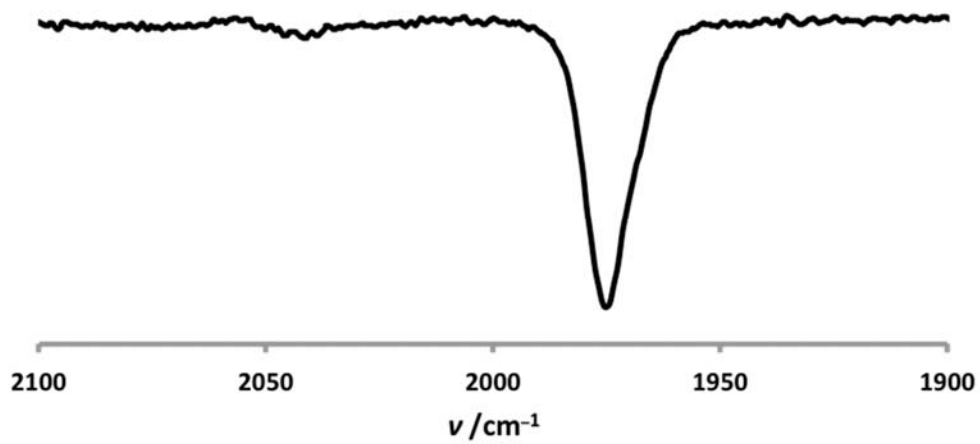

**Figure S17.** FT-IR spectrum ( $\nu_{\text{CO}}$  region,  $\text{CH}_2\text{Cl}_2$ ) of  $[\mathbf{1c}](\text{BF}_4)_2$ .

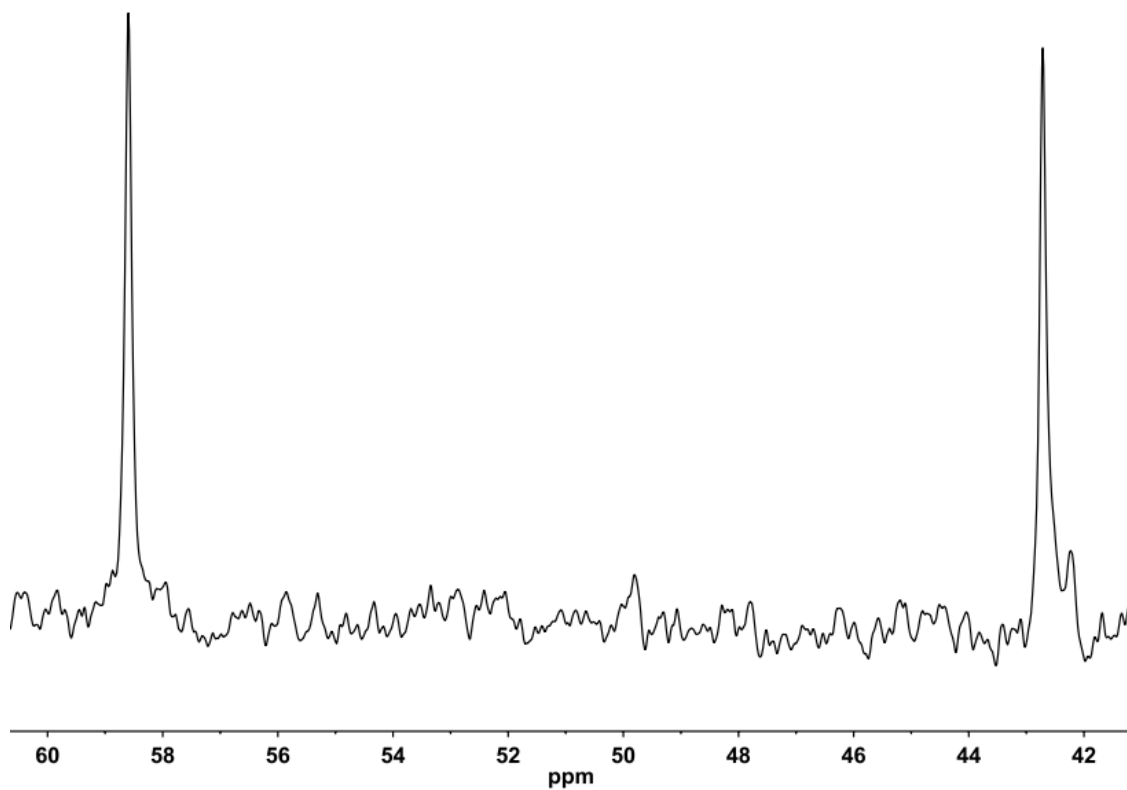

**Figure S18.**  $^{31}\text{P}\{^1\text{H}\}$  NMR spectrum ( $\text{CD}_2\text{Cl}_2$ , 202 MHz) of  $[\mathbf{1c}](\text{BF}_4)_2$ .

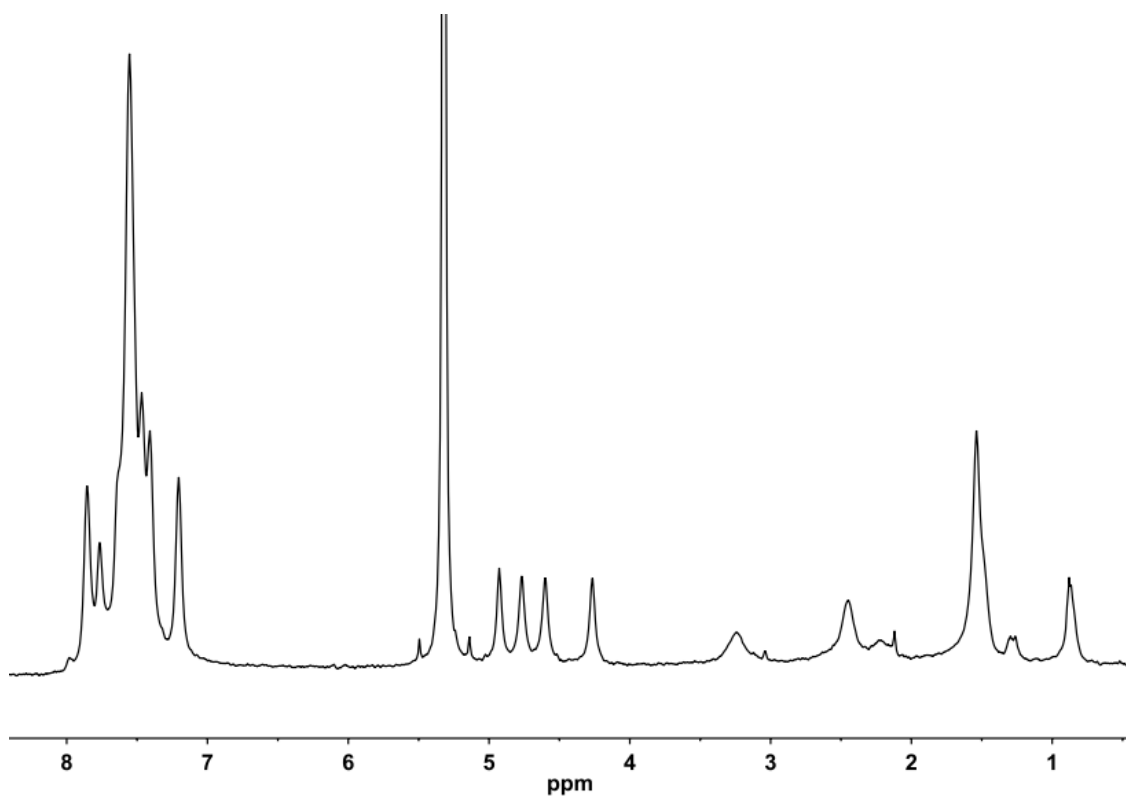

**Figure S19.**  $^1\text{H}$  NMR spectrum ( $\text{CD}_2\text{Cl}_2$ , 500 MHz) of  $[\mathbf{1c}](\text{BF}_4)_2$ . Resonances at 3.43 ( $\text{Et}_2\text{O}$ ), 1.31 (pentane), 1.12 ( $\text{Et}_2\text{O}$ ) and 0.89 ppm (pentane) are from impurities in the NMR solvent.

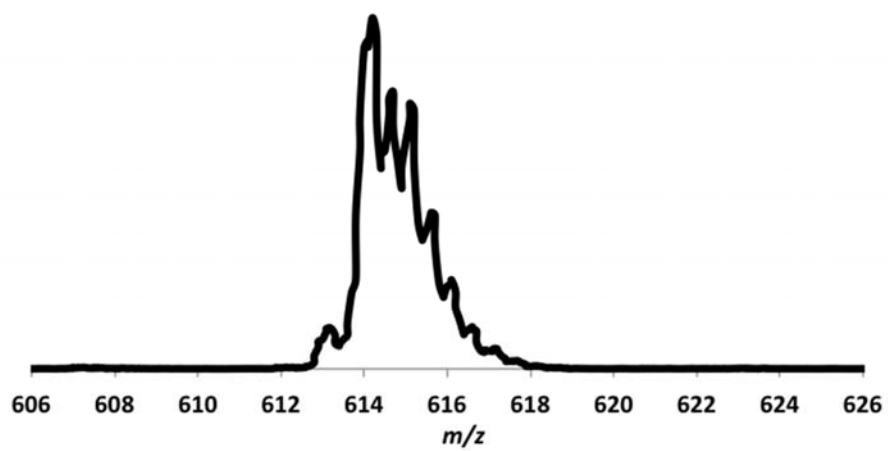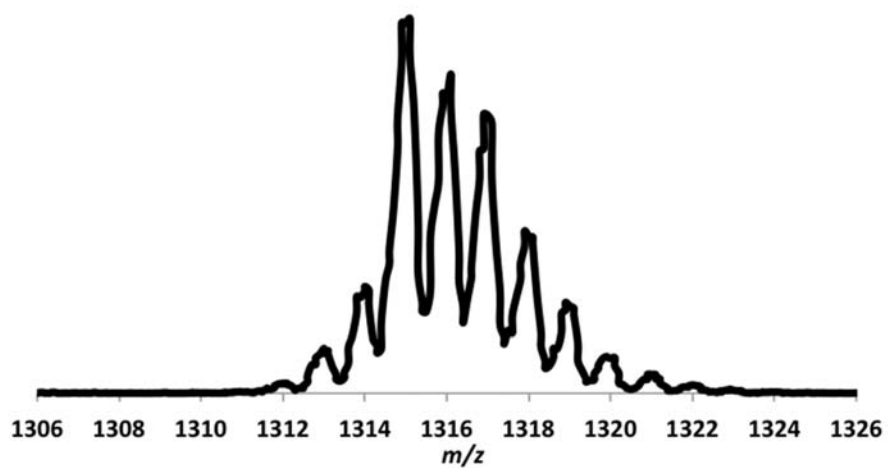

**Figure S20:** Positive ion ESI mass spectra of  $[1c](BF_4)_2$ .

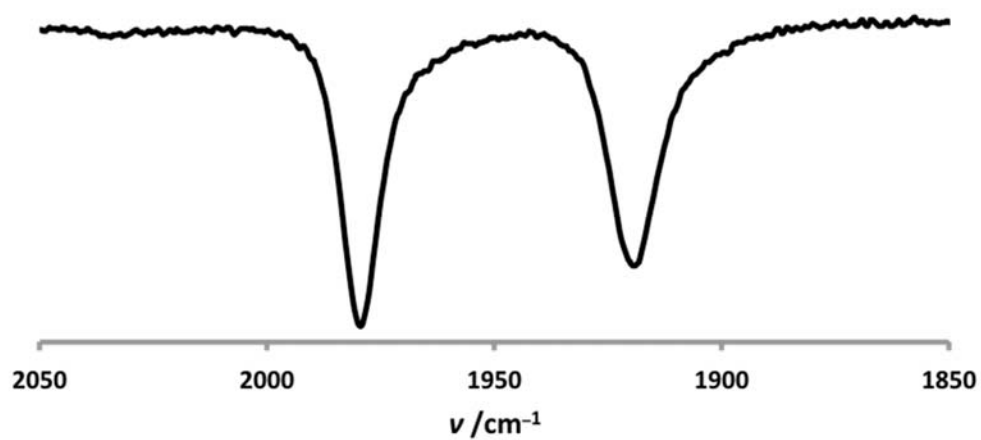

Figure S21. FT-IR spectrum ( $\nu_{\text{CO}}$  region,  $\text{CH}_2\text{Cl}_2$ ) of  $[\mathbf{2a}]\text{BF}_4$ .

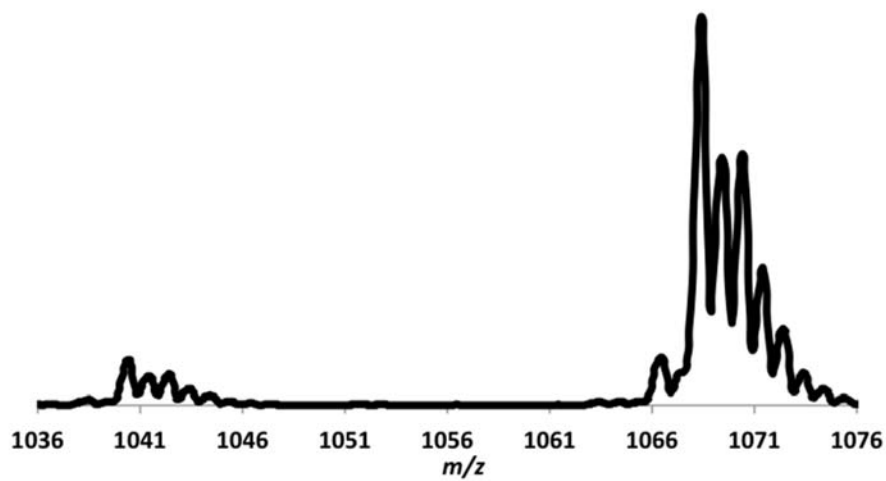

Figure S22. Positive ion ESI mass spectrum of  $[\mathbf{2a}]\text{BF}_4$ .

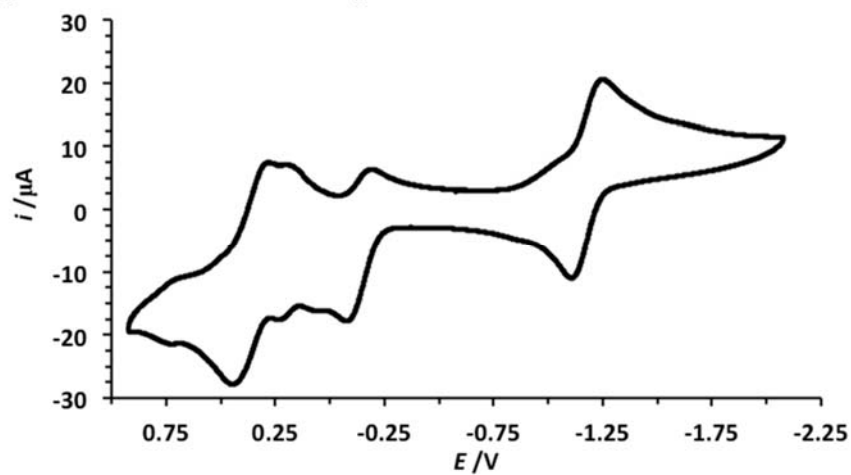

Figure S23. Cyclic voltammogram of  $[\mathbf{2a}]\text{BF}_4$ .

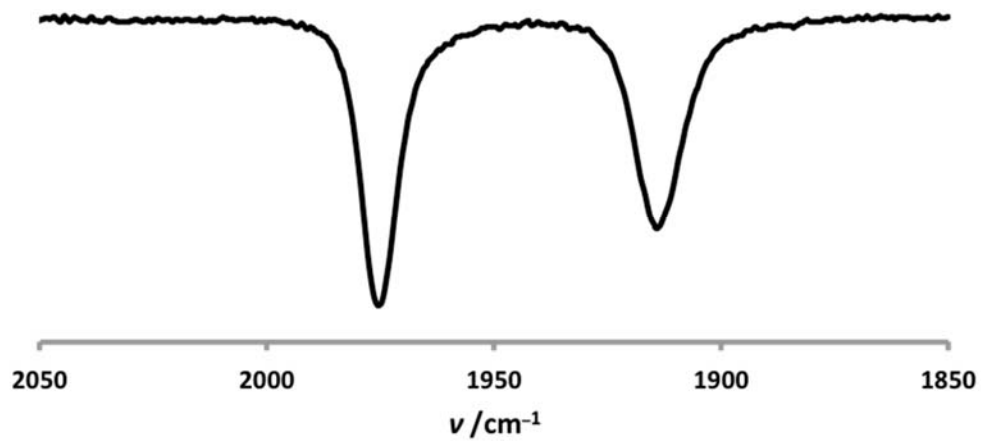

**Figure S24.** FT-IR spectrum ( $\nu_{\text{CO}}$  region,  $\text{CH}_2\text{Cl}_2$ ) of **[2b]** $\text{BF}_4$ .

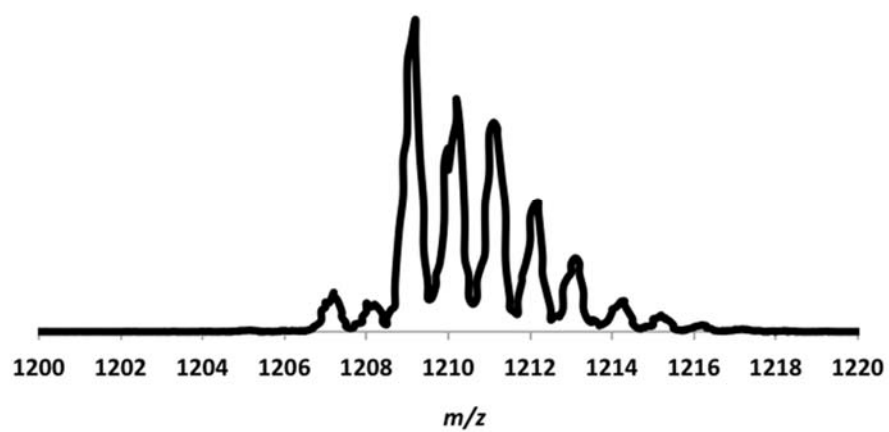

**Figure S25.** Positive ion ESI mass spectrum of **[2b]** $\text{BF}_4$ .

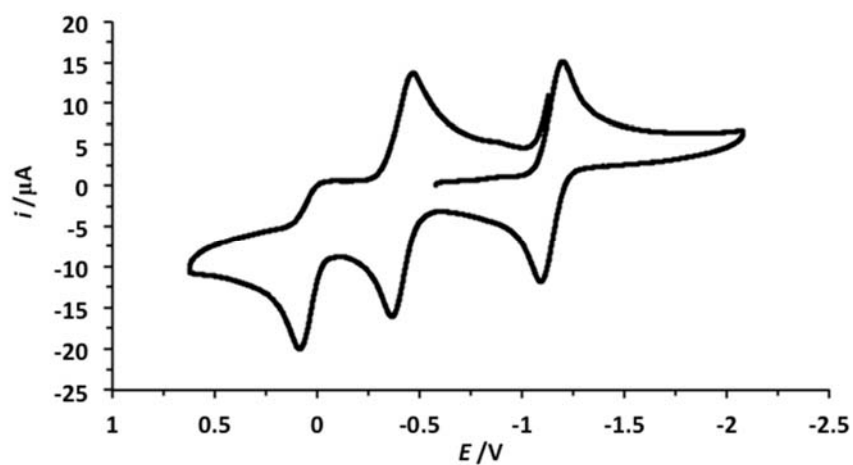

Figure S26. Cyclic voltammogram of [2b]BF<sub>4</sub>.

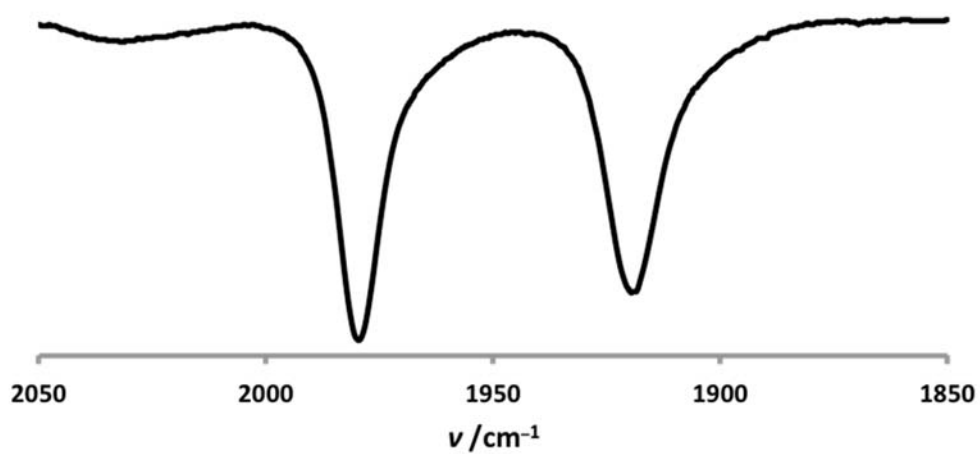

Figure S27: FT-IR spectrum ( $\nu_{\text{CO}}$  region, CH<sub>2</sub>Cl<sub>2</sub>) of [2c]BF<sub>4</sub>.

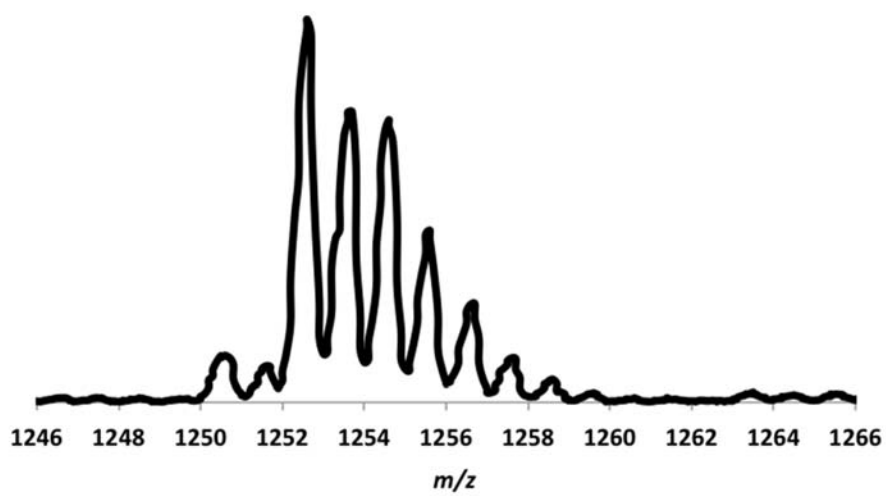

**Figure S28.** Positive ion ESI mass spectrum of [2c]BF<sub>4</sub>.

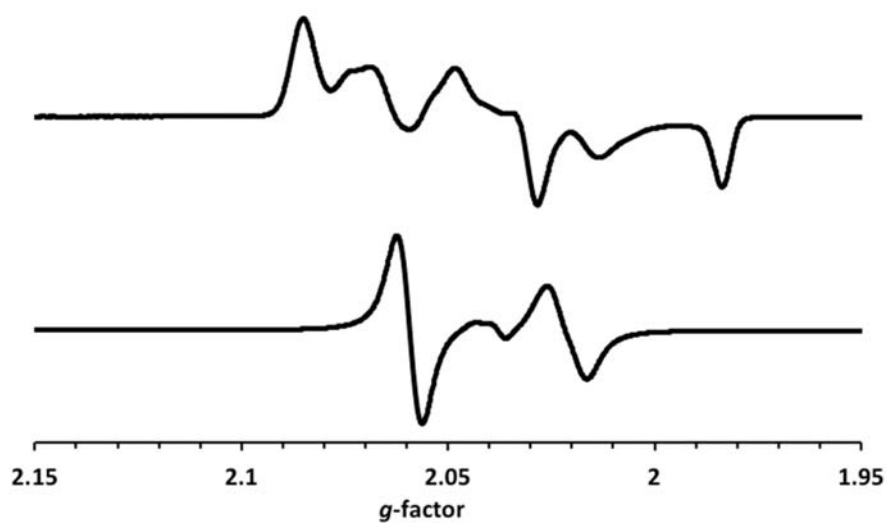

**Figure S29.** X-band EPR spectra of [2c]BF<sub>4</sub> in CH<sub>2</sub>Cl<sub>2</sub>/PhMe recorded at 110 K (top) and room temperature (bottom).

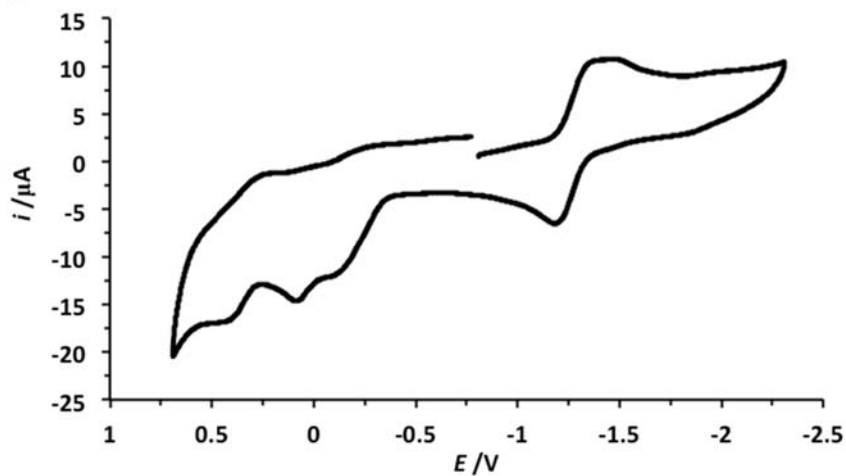

**Figure S30.** Cyclic voltammogram of [2c]BF<sub>4</sub>.



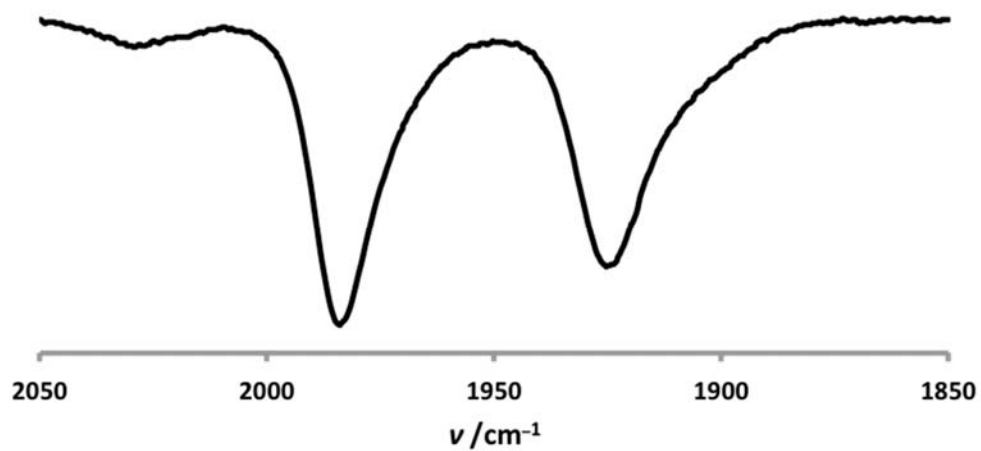

**Figure S31:** FT-IR spectrum ( $\nu_{\text{CO}}$  region,  $\text{CH}_2\text{Cl}_2$ ) of  $[\mathbf{3}](\text{BF}_4)_2$ .

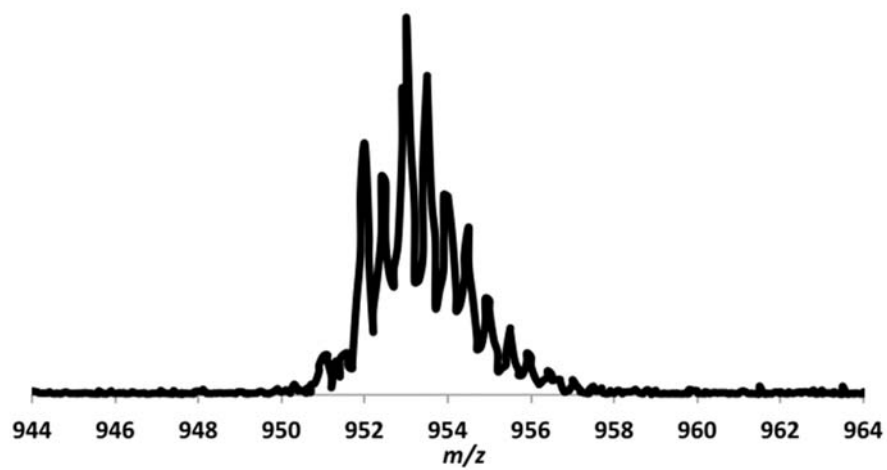

**Figure S32.** Positive ion ESI mass spectrum of  $[\mathbf{3}](\text{BF}_4)_2$ .

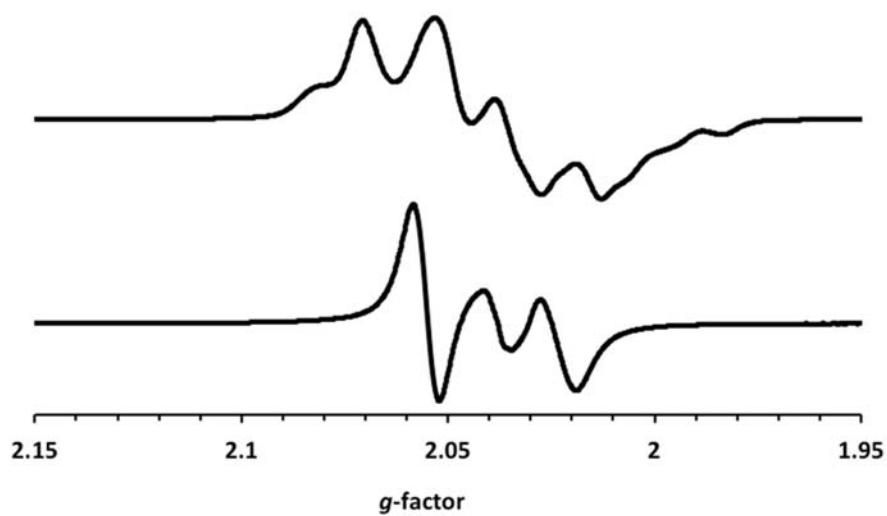

**Figure S33.** X-band EPR spectra of  $[3](BF_4)_2$  in  $CH_2Cl_2/PhMe$  recorded at 110 K (top) and room temperature (bottom).

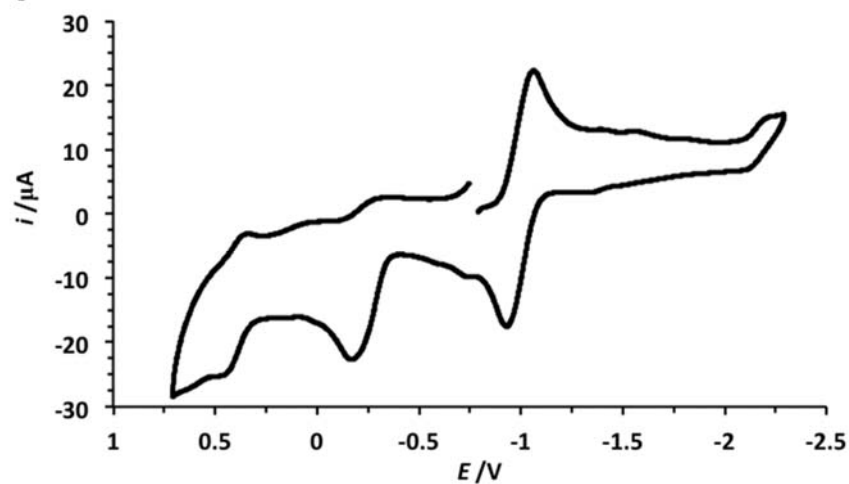

**Figure S34.** Cyclic voltammogram of  $[3](BF_4)_2$ .
